# Supplementary material for: Prevalence and incidence of musculoskeletal extremity complaints in children and adolescents. A systematic review
Source: BMC Musculoskelet Disord. 2017 Oct 18;18:418. doi: 10.1186/s12891-017-1771-2 (PMC5648427; doi:10.1186/s12891-017-1771-2)
Supplement: Supplementary file 2 — overview of the tool used for the quality assessment (PDF 72 kb) [file 12891_2017_1771_MOESM2_ESM.pdf]

Author:

Year:

Rater:

| Domain                                                                                                                                                                                                                                                                                                                                                                                                                                                                                                                               | Description                                                                                                                                         |
|--------------------------------------------------------------------------------------------------------------------------------------------------------------------------------------------------------------------------------------------------------------------------------------------------------------------------------------------------------------------------------------------------------------------------------------------------------------------------------------------------------------------------------------|-----------------------------------------------------------------------------------------------------------------------------------------------------|
| <ol style="list-style-type: none"><li>1. Study participation<ol style="list-style-type: none"><li>a. Adequate participation in the study by eligible persons</li><li>b. Description of the source population or population of interest</li><li>c. Description of the baseline study sample</li><li>d. Adequately description of the sampling frame and recruitment.</li><li>e. Adequately description of the period and place of recruitment</li><li>f. Adequate description of inclusion and exclusion criteria</li></ol></li></ol> | <ol style="list-style-type: none"><li>a. Yes/no</li><li>b. Yes/no</li><li>c. Yes/no</li><li>d. Yes/no</li><li>e. Yes/no</li><li>f. Yes/no</li></ol> |
| <ol style="list-style-type: none"><li>2. Study Attrition<ol style="list-style-type: none"><li>A. Adequate respons rate for study participation</li><li>B. Description of attempts to collect information on participants of people who dropped out.</li><li>C. Reasons for loss of follow up are provided.</li><li>D. Adequate description of participants lost to follow-up.</li><li>E. There are no important differences between participants who completed the study and those you did not.</li></ol></li></ol>                  | <ol style="list-style-type: none"><li>a. Yes/no</li><li>b. Yes/no</li><li>c. Yes/no</li><li>d. Yes/no</li><li>e. Ok?</li></ol>                      |
| <ol style="list-style-type: none"><li>3. Outcome measurement<ol style="list-style-type: none"><li>a. A clear definition of outcome is provided.</li><li>b. Method of outcome measurement used is adequately valid and reliable</li><li>c. Method and setting of outcome measurements is the same for all study participants</li></ol></li></ol>                                                                                                                                                                                      | <ol style="list-style-type: none"><li>a. Yes/no</li><li>b. Yes/no</li><li>c. Yes/no</li></ol>                                                       |
|                                                                                                                                                                                                                                                                                                                                                                                                                                                                                                                                      |                                                                                                                                                     |

|                                                                                                                                                 |                     |
|-------------------------------------------------------------------------------------------------------------------------------------------------|---------------------|
| 4. Analysis and reporting<br>a. To Access prevalence rates /. Sufficient presentation of data.<br>b. There is no selective reporting of results | a. Yes/no<br>b. Ok? |
|-------------------------------------------------------------------------------------------------------------------------------------------------|---------------------|

## Potential bias

### 1. Study participation

The study sample adequately represents the population of interest

#### Judgement

Yes  
Partly  
No  
Not reported/unsure

### 2. Study Attrition

The study data available (i.e. participants not lost to follow-up) adequately represent the study sample

#### Judgement

Yes  
Partly  
No  
Not reported/unsure

### 3. Outcome measurement

The outcome of interest is measured in a similar way for all participants.

#### Judgement

Yes  
Partly  
No  
Not reported/unsure

### 4. Analysis and reporting

The statistical analysis is appropriate, and all primary outcomes are reported

#### Judgement

Yes  
Partly  
No  
Not reported/unsure

**Additional comments:**
